# Supplementary material for: Distinct Autoimmune Antibody Signatures Between Hospitalized Acute COVID-19 Patients, SARS-CoV-2 Convalescent Individuals, and Unexposed Pre-Pandemic Controls
Source: bioRxiv or medRxiv preprint supplement (doi:10.1101/2021.01.21.21249176), 2021-01-25
Supplement: Supplementary file [file media-1.pdf]

**Supplemental Table 1. Autoantibody profiles from unexposed pre-pandemic, acute COVID-19 hospitalized, SARS-CoV-2 infected convalescent, and unexposed SLE subjects.** The Mean Fluorescence Intensity (MFI) of each result is shown. All colored boxes indicate the presence of AAB with positivity and magnitude determined individually for each readout as follows : yellow = MFI > the average of all non-SLE pre-pandemic subjects (group 1, n=29) +3 standard deviations (SD) of that value, orange = MFI > avg of non-SLE pre-pandemics +5 SD, red => avg of non-SLE pre-pandemics +8 SD. Individual subjects with at least one AAB have labels in bold. Autoantibody abbreviations: SSA/Ro60= Anti-Sjögren's Syndrome-related antigen A/Ro60 kDa; SSA/Ro52=Anti-Sjögren's Syndrome-related antigen A/Ro52 kDa; SSB/La= Anti-Sjögren's Syndrome-related antigen B/La; RNP/Sm= Anti-RNP/Smith; Sm= anti-Sm; Prot 3= Anti-Proteinase 3; Myeloper= Anti-Myeloperoxidase; Beta 2-G= Anti-β 2-Glycoprotein; CENP-A= Anti-Centromere Protein A; CENP-B= Anti-Centromere Protein B; Scl-70= Anti-Scl-70; Jo-1= Anti-Jo-1; C1q= Anti-C1q; PM/Scl-100=Anti-PM/Scl-100; Ku= Anti-Ku; Mi2= Anti-Mi-2; PL-12= Anti-Alanyl-tRNA synthetase

|                                    | Autoantibody |          |        |        |      |        |          |          |      |        |        |        |       |       |            |       |      |       |     |
|------------------------------------|--------------|----------|--------|--------|------|--------|----------|----------|------|--------|--------|--------|-------|-------|------------|-------|------|-------|-----|
|                                    | SSA/Ro60     | SSA/Ro52 | SSB/La | RNP/SM | Sm   | Prot 3 | Myeloper | Beta 2-G | PCNA | CENP-A | CENP-B | Scl-70 | Jo-1  | C1q   | PM/Scl-100 | Ku    | Mi-2 | PL-12 |     |
| <b>Pre-pandemic</b>                |              |          |        |        |      |        |          |          |      |        |        |        |       |       |            |       |      |       |     |
| P1                                 | 1394         | 1116     | 15     | 5      | 27   | 45     | 8        | 22       | 1031 | 113    | 7      | 233    | 271   | 57    | 184        | 209   | 1120 | 182   |     |
| P2                                 | 41           | 4110     | 81     | 45     | 241  | 58     | 28       | 52       | 213  | 20183  | 1911   | 6858   | 278   | 882   | 1010       | 10300 | 643  | 3632  |     |
| P3                                 | 24           | 245      | 18     | 6      | 109  | 193    | 166      | 40       | 17   | 313    | 1280   | 73     | 33    | 17    | 11         | 159   | 88   | 49    |     |
| P4                                 | 81           | 111      | 23     | 9      | 78   | 61     | 21       | 66       | 104  | 202    | 92     | 147    | 381   | 28    | 185        | 1081  | 445  | 176   |     |
| P5                                 | 36           | 8103     | 50     | 27     | 182  | 201    | 21       | 23       | 35   | 19519  | 836    | 522    | 297   | 347   | 68         | 875   | 162  | 146   |     |
| P6                                 | 36           | 217      | 76     | 26     | 356  | 57     | 19       | 85       | 23   | 284    | 104    | 104    | 59    | 24    | 58         | 121   | 200  | 122   |     |
| P7                                 | 36           | 709      | 18     | 5      | 54   | 35     | 5        | 356      | 17   | 45     | 11     | 163    | 35    | 1549  | 10         | 84    | 69   | 196   |     |
| P8                                 | 17           | 115      | 6      | 51     | 50   | 24     | 8        | 52       | 19   | 143    | 2      | 301    | 64    | 45    | 195        | 130   | 101  | 76    |     |
| P9                                 | 21           | 80       | 20     | 8      | 84   | 24     | 36       | 26       | 555  | 556    | 189    | 109    | 785   | 96    | 18         | 2630  | 82   | 59    |     |
| P10                                | 21           | 163      | 60     | 32     | 263  | 29     | 13       | 97       | 3160 | 126    | 11     | 55     | 3195  | 173   | 22         | 36    | 83   | 62    |     |
| P11                                | 47           | 493      | 24     | 17     | 269  | 35     | 8        | 8        | 388  | 44     | 10     | 426    | 69    | 550   | 744        | 28    | 386  | 45    |     |
| P12                                | 40           | 85       | 28     | 17     | 81   | 159    | 10       | 45       | 35   | 160    | 27     | 322    | 1018  | 342   | 137        | 220   | 139  | 247   |     |
| P13                                | 31           | 88       | 584    | 10     | 59   | 35     | 3        | 12       | 934  | 53     | 4      | 94     | 29    | 107   | 58         | 164   | 80   | 60    |     |
| P14                                | 204          | 349      | 23     | 80     | 531  | 85     | 23       | 87       | 130  | 1704   | 648    | 6536   | 366   | 13272 | 49         | 222   | 222  | 304   |     |
| P15                                | 8            | 45       | 3      | 4      | 15   | 17     | 3        | 283      | 17   | 787    | 29     | 42     | 686   | 459   | 27         | 52    | 74   | 36    |     |
| P16                                | 11           | 54       | 108    | 8      | 25   | 28     | 9        | 100      | 2763 | 686    | 272    | 84     | 29    | 57    | 52         | 270   | 55   |       |     |
| P17                                | 15           | 1622     | 215    | 11     | 28   | 62     | 17       | 69       | 28   | 3725   | 22     | 52     | 71    | 49    | 104        | 44    | 236  | 126   |     |
| P18                                | 37           | 786      | 39     | 25     | 103  | 43     | 15       | 152      | 26   | 18091  | 26     | 80     | 69    | 327   | 829        | 13335 | 155  | 390   |     |
| P19                                | 35           | 20409    | 688    | 465    | 1608 | 104    | 26       | 127      | 1396 | 702    | 31     | 220    | 437   | 693   | 318        | 1913  | 150  | 663   |     |
| P20                                | 43           | 73       | 26     | 18     | 72   | 53     | 18       | 28       | 27   | 94     | 10     | 1452   | 29    | 163   | 116        | 73    | 108  | 470   |     |
| P21                                | 18           | 149      | 40     | 17     | 86   | 183    | 74       | 65       | 30   | 1064   | 12100  | 127    | 529   | 2623  | 31         | 414   | 615  | 124   |     |
| P22                                | 106          | 382      | 116    | 68     | 538  | 86     | 19       | 83       | 109  | 451    | 27     | 250    | 217   | 3974  | 603        | 751   | 389  | 1185  |     |
| P23                                | 16           | 64       | 47     | 18     | 225  | 32     | 7        | 16       | 8    | 167    | 8      | 94     | 37    | 21    | 21         | 21    | 58   | 37    |     |
| P24                                | 9            | 408      | 71     | 10     | 76   | 197    | 11       | 21       | 17   | 139    | 10     | 48     | 53    | 590   | 19         | 357   | 63   | 22    |     |
| P25                                | 73           | 84       | 22     | 15     | 55   | 155    | 18       | 40       | 28   | 93     | 48     | 3256   | 168   | 566   | 87         | 579   | 75   | 44    |     |
| P26                                | 17           | 47       | 36     | 18     | 33   | 82     | 48       | 36       | 130  | 143    | 21     | 42     | 236   | 40    | 52         | 119   | 54   | 318   |     |
| P27                                | 24           | 332      | 11     | 6      | 57   | 54     | 3        | 758      | 19   | 397    | 23     | 37     | 223   | 220   | 17         | 51    | 63   | 56    |     |
| P28                                | 10           | 134      | 31     | 12     | 60   | 41     | 3        | 12       | 621  | 915    | 10     | 90     | 215   | 25    | 18         | 205   | 87   | 68    |     |
| P29                                | 12           | 336      | 20     | 7      | 29   | 194    | 225      | 85       | 7018 | 83     | 7      | 39     | 186   | 85    | 182        | 4881  | 66   | 118   |     |
| <b>Acute COVID-19 hospitalized</b> |              |          |        |        |      |        |          |          |      |        |        |        |       |       |            |       |      |       |     |
| A1                                 | 5            | 41       | 5      | 6      | 17   | 25     | 1        | 14       | 39   | 687    | 2      | 22     | 43    | 10    | 65         | 48    | 51   | 21    |     |
| A2                                 | 69           | 1272     | 339    | 147    | 643  | 204    | 20       | 110      | 548  | 755    | 40     | 167    | 1058  | 66    | 51         | 336   | 315  | 828   |     |
| A3                                 | 58           | 112      | 65     | 61     | 144  | 217    | 40       | 179      | 123  | 184    | 131    | 1796   | 470   | 13944 | 90         | 1062  | 233  | 389   |     |
| A4                                 | 12           | 94       | 488    | 11     | 136  | 35     | 7        | 51       | 10   | 8601   | 263    | 947    | 134   | 24    | 11         | 42    | 33   | 33    |     |
| A5                                 | 49           | 149      | 91     | 54     | 223  | 139    | 19       | 46       | 480  | 674    | 619    | 404    | 176   | 89    | 37         | 99    | 551  | 140   |     |
| A6                                 | 35           | 308      | 99     | 52     | 333  | 280    | 151      | 121      | 4150 | 890    | 26     | 309    | 541   | 1206  | 37         | 212   | 279  | 496   |     |
| A7                                 | 37           | 1264     | 333    | 189    | 811  | 183    | 14       | 169      | 234  | 267    | 293    | 111    | 270   | 100   | 40         | 2152  | 97   | 252   |     |
| A8                                 | 886          | 498      | 269    | 171    | 885  | 123    | 3349     | 454      | 16   | 184    | 24     | 1042   | 171   | 107   | 24         | 32    | 91   | 96    |     |
| A9                                 | 101          | 2474     | 76     | 49     | 139  | 291    | 16       | 31       | 113  | 629    | 73     | 763    | 3179  | 120   | 911        | 4092  | 535  | 662   |     |
| A10                                | 21           | 3178     | 33     | 19     | 66   | 89     | 10       | 50       | 457  | 32     | 233    | 40     | 222   | 326   | 546        | 36    | 130  | 121   | 187 |
| A11                                | 28           | 885      | 66     | 46     | 163  | 157    | 31       | 68       | 47   | 270    | 22     | 140    | 1209  | 194   | 114        | 990   | 688  | 234   |     |
| A12                                | 58           | 498      | 228    | 142    | 516  | 263    | 56       | 77       | 30   | 315    | 386    | 353    | 2221  | 107   | 75         | 61    | 122  | 477   |     |
| A13                                | 247          | 279      | 45     | 26     | 52   | 99     | 20       | 203      | 87   | 2008   | 24     | 954    | 105   | 172   | 41         | 214   | 893  | 127   |     |
| A14                                | 27           | 624      | 100    | 43     | 131  | 70     | 11       | 16       | 193  | 1178   | 20     | 2344   | 2064  | 343   | 52         | 817   | 272  | 397   |     |
| A15                                | 35           | 21600    | 48     | 110    | 8031 | 68     | 162      | 120      | 245  | 357    | 82     | 770    | 1197  | 2203  | 206        | 81    | 246  | 2811  |     |
| A16                                | 149          | 979      | 722    | 120    | 522  | 229    | 61       | 220      | 158  | 2240   | 703    | 891    | 10365 | 869   | 179        | 2844  | 388  | 1286  |     |
| A17                                | 149          | 380      | 246    | 326    | 199  | 656    | 68       | 542      | 239  | 1376   | 27     | 3117   | 11806 | 146   | 1997       | 3874  | 451  | 1930  |     |
| A18                                | 507          | 218      | 109    | 87     | 142  | 191    | 56       | 233      | 4126 | 223    | 31373  | 423    | 126   | 400   | 112        | 1617  | 326  | 628   |     |
| A19                                | 55           | 574      | 148    | 104    | 676  | 278    | 48       | 214      | 63   | 2214   | 44     | 1633   | 1271  | 931   | 175        | 9230  | 508  | 2033  |     |
| A20                                | 46           | 341      | 81     | 65     | 106  | 230    | 85       | 512      | 2178 | 298    | 453    | 455    | 420   | 157   | 94         | 1021  | 390  | 1651  |     |
| <b>SARS-CoV-2 Convalescent</b>     |              |          |        |        |      |        |          |          |      |        |        |        |       |       |            |       |      |       |     |
| S1                                 | 22           | 53       | 28     | 10     | 65   | 99     | 15       | 106      | 26   | 612    | 148    | 650    | 266   | 221   | 75         | 5776  | 334  | 233   |     |
| S2                                 | 31           | 1294     | 76     | 19     | 139  | 162    | 11       | 554      | 345  | 895    | 5      | 82     | 5598  | 205   | 34         | 29    | 83   | 1530  |     |
| S3                                 | 77           | 1073     | 19     | 11     | 47   | 214    | 7        | 54       | 37   | 218    | 8      | 951    | 653   | 458   | 28         | 137   | 702  | 181   |     |
| S4                                 | 25           | 916      | 381    | 230    | 987  | 500    | 12       | 48       | 140  | 195    | 7      | 738    | 776   | 117   | 68         | 226   | 548  | 1610  |     |
| S5                                 | 14           | 106      | 16     | 7      | 29   | 32     | 35       | 22       | 6720 | 619    | 38     | 631    | 5948  | 43    | 24         | 491   | 719  | 237   |     |
| S6                                 | 2217         | 624      | 59     | 18     | 125  | 68     | 12       | 54       | 24   | 285    | 26     | 8142   | 44    | 733   | 75         | 104   | 855  | 317   |     |
| S7                                 | 32           | 1411     | 883    | 570    | 1809 | 76     | 21       | 116      | 152  | 1937   | 40     | 4842   | 372   | 182   | 98         | 327   | 749  | 217   |     |
| S8                                 | 70           | 45       | 24     | 14     | 285  | 1794   | 13       | 68       | 2252 | 110    | 7      | 524    | 77    | 2486  | 84         | 737   | 169  | 215   |     |
| S9                                 | 11           | 403      | 10     | 3      | 43   | 23     | 1        | 5679     | 34   | 553    | 8      | 37     | 91    | 43    | 10         | 1218  | 52   | 109   |     |
| <b>SLE (pre-pandemic)</b>          |              |          |        |        |      |        |          |          |      |        |        |        |       |       |            |       |      |       |     |
| SL1                                | 23398        | 4840     | 40     | 76     | 506  | 88     | 68       | 69       | 144  | 281    | 18     | 111    | 1145  | 683   | 31         | 698   | 699  | 142   |     |
| SL2                                | 4663         | 19781    | 10928  | 21     | 145  | 132    | 17       | 30       | 274  | 293    | 17     | 58     | 200   | 13378 | 1139       | 1826  | 397  | 208   |     |
| SL3                                | 174          | 64       | 29     | 14     | 64   | 129    | 11       | 15       | 17   | 1102   | 30     | 42     | 130   | 134   | 197        | 232   | 55   | 58    |     |
| SL4                                | 62           | 1876     | 1647   | 1122   | 3379 | 61     | 34       | 134      | 85   | 405    | 17     | 4265   | 882   | 476   | 1541       | 549   | 153  | 7342  |     |
| SL5                                | 27199        | 10533    | 106    | 42     | 259  | 154    | 37       | 171      | 563  | 20933  | 525    | 667    | 999   | 14812 | 414        | 736   | 2582 | 900   |     |
| SL6                                | 36           | 1539     | 132    | 89     | 742  | 160    | 3416     | 114      | 332  | 2846   | 72     | 298    | 1412  | 152   | 674        | 216   | 244  | 179   |     |
